# Supplementary material for: Improving Electrochemical Performance of Ultrahigh-Loading Cathodes via the Addition of Multi-Walled Carbon Nanotubes
Source: MDPI journal article supplement (doi:10.3390/nano15030156), 2025-01-21
Supplement: s1 [file nanomaterials-3385083-supplementary.pdf › nanomaterials-3385083-supplementary.pdf]

## Supplementary Materials

### **Improving Electrochemical Performance of Ultrahigh-Loading Cathodes via the Addition of Multi-Walled Carbon Nanotubes**

**Chan Ju Choi<sup>a</sup>, Tae Heon Kim<sup>a</sup>, Hyun Woo Kim<sup>b</sup>, Do Man Jeon<sup>c,\*</sup> and Jinhyup Han<sup>a,\*</sup>**

- a. Department of Chemical Engineering, Keimyung University, Daegu 42601, Republic of  
Korea
- b. Research Center for Materials Analysis, Korea Basic Science Institute (KBSI), Daejeon 34133,  
Republic of Korea
- c. Gumi Electronics & Information Technology Research Institute (GERI), Gumi 39171, Republic  
of Korea

\*Corresponding authors: [jhan@kmu.ac.kr](mailto:jhan@kmu.ac.kr) (J. Han) & [jdm1213@geri.re.kr](mailto:jdm1213@geri.re.kr) (D.M. Jeon)

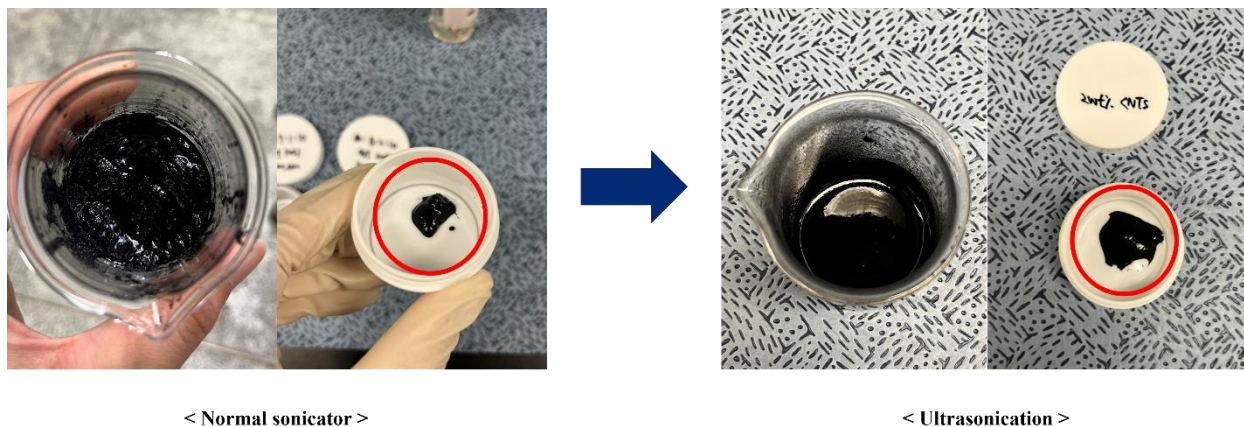

**Figure S1.** Comparison of MWCNTs dispersion using normal sonication and ultrasonication. MWCNTs are homogenously distributed through ultrasonication.

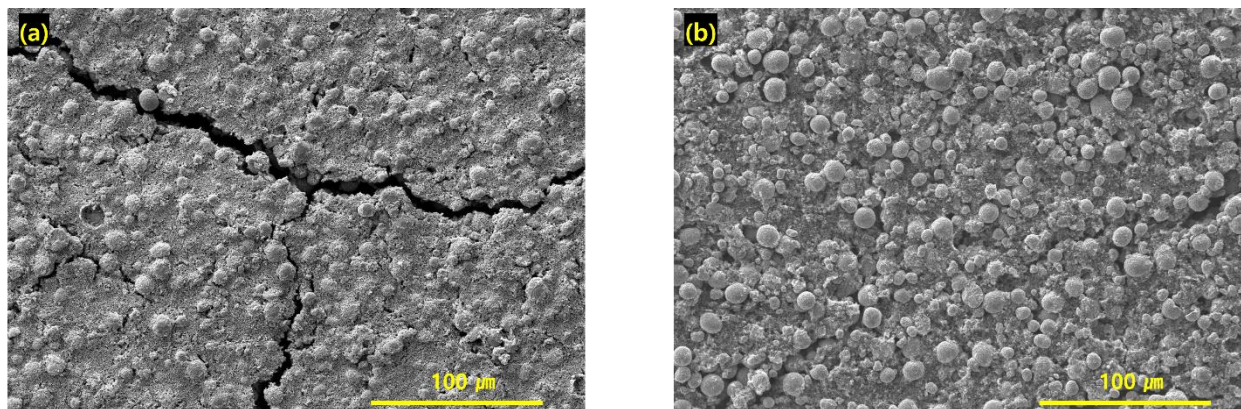

**Figure S2.** Surface images of electrodes after conducting C-rate capability test, performing recovery from high current rate of 1 C to lower rate of 0.1 C for (a) pristine cathode and (b) MWCNT-incorporated cathode.

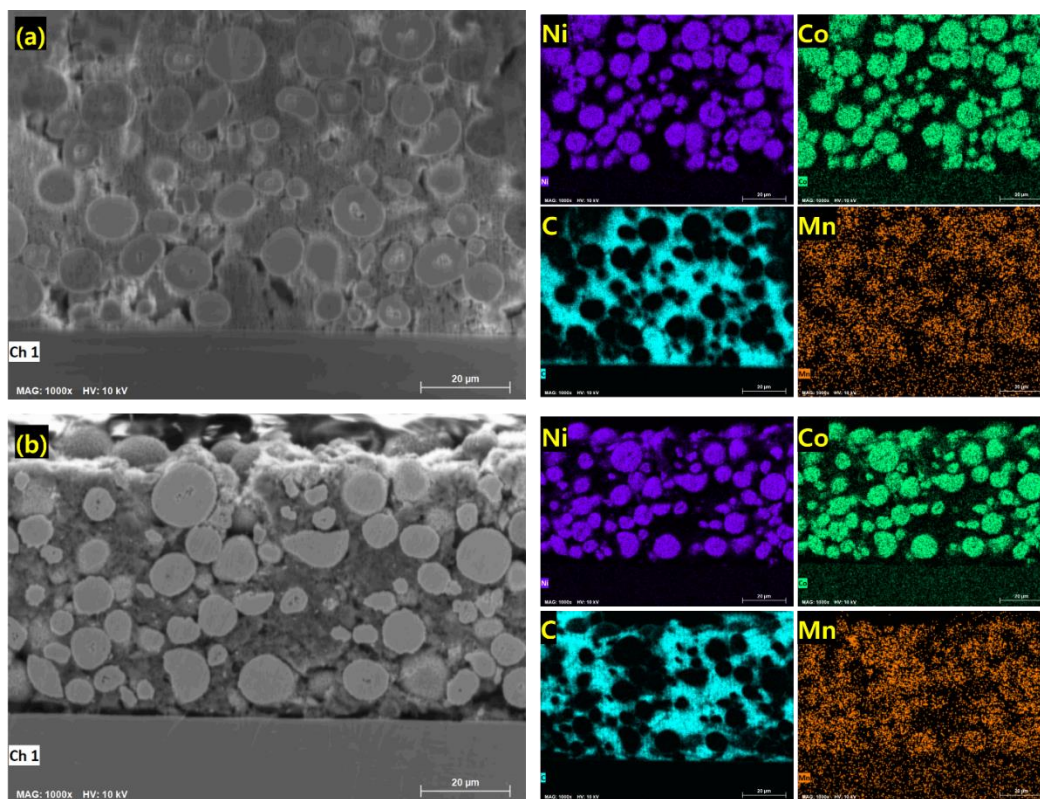

**Figure S3.** Energy dispersive spectroscopy mapping images of NCM811 cathode metals in the internal structure of the (a) electrode containing only carbon black and (b) electrode incorporating 2 wt% MWCNTs.



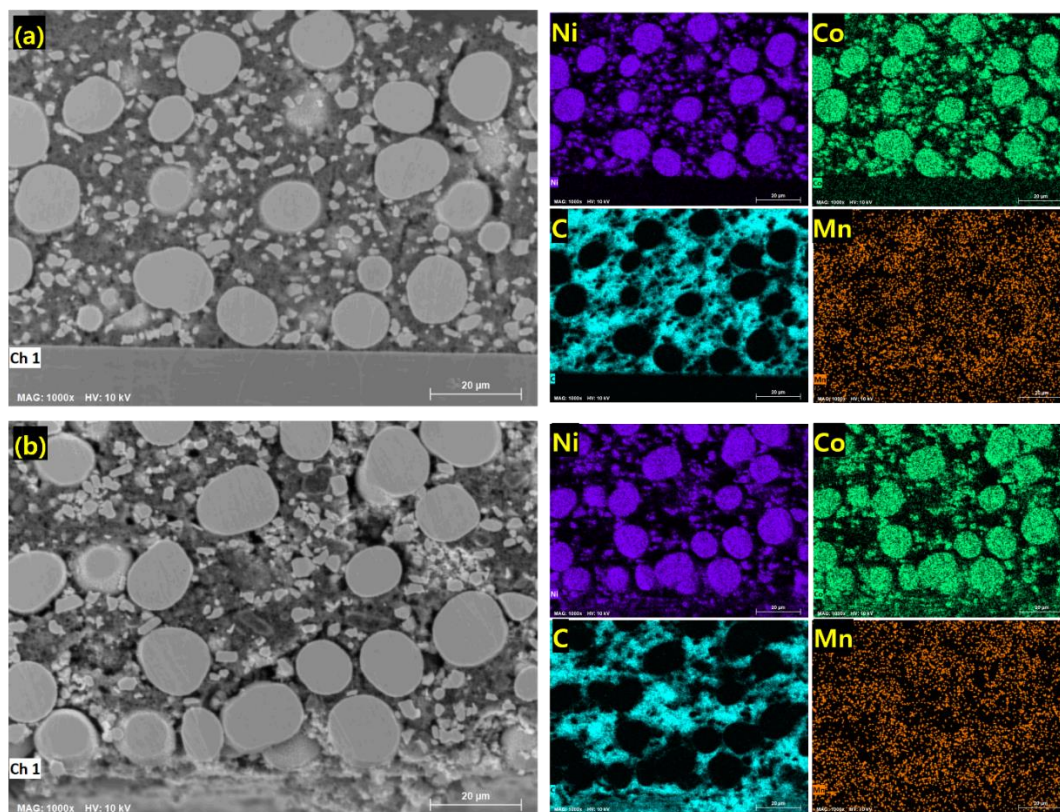

**Figure S4.** Energy dispersive spectroscopy mapping images of Ni92% cathode metals in the internal structure of the (a) electrode containing only carbon black and (b) electrode incorporating 2 wt% MWCNTs.

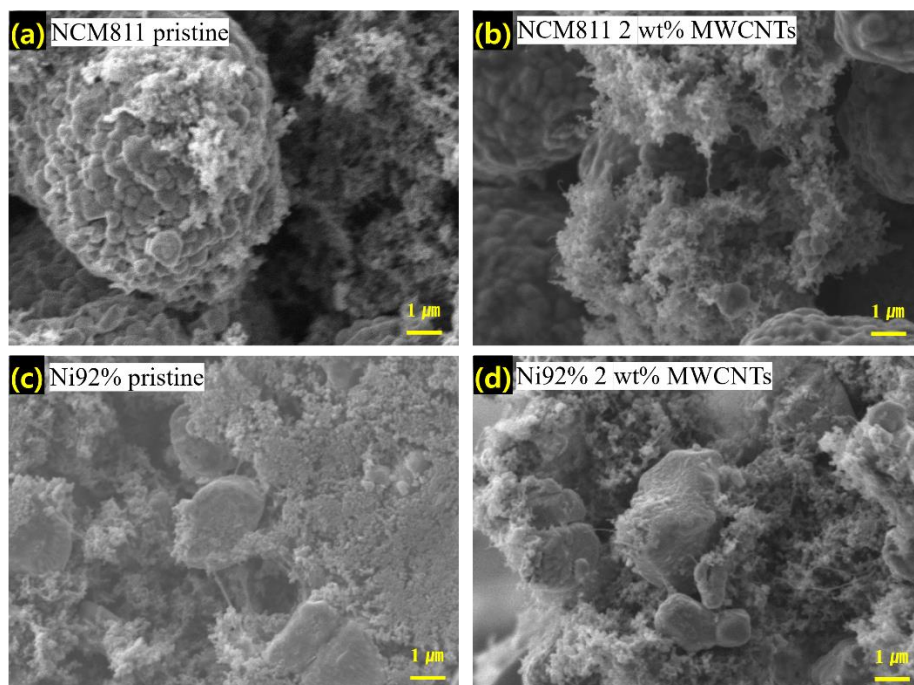

**Figure S5.** Images of inside the electrode with NCM811 (a) pristine electrode and (b) electrode with 2 wt% MWCNTs. Images of inside the electrode with Ni92% cathode (c) pristine electrode and (d) electrode with 2 wt% MWCNTs.
